# Supplementary material for: Cryogenic Comminution of Subsea Cables and Flowlines: A Pathway for Circular Recycling of End-of-Life Offshore Infrastructure
Source: Preprints.org preprint supplement (doi:10.20944/preprints202309.1489.v1), 2023-09-22
Supplement: Supplementary file 1 [file supplementary]

Supplementary Information

Cryogenic comminution of subsea cables and flowlines: a pathway for circular recycling of end-of-life offshore infrastructure

Ibukun Oluwoye * and Arun Mathew

Curtin Corrosion Centre, Western Australian School of Mines: Minerals, Energy and Chemical Engineering, Curtin University, Perth, Australia

***** Correspondence: Ibukun.Oluwoye@Curtin.edu.au

**Figure S1.** Variations in average temperature of the flexible flowline (i.e., average of all layers of the flowline during cryogenic cooling).

Supplementary Information

Cryogenic comminution of subsea cables and flowlines: a pathway for circular recycling of end-of-life offshore infrastructure

Ibukun Oluwoye * and Arun Mathew

Curtin Corrosion Centre, Western Australian School of Mines: Minerals, Energy and Chemical Engineering, Curtin University, Perth, Australia

***** Correspondence: Ibukun.Oluwoye@Curtin.edu.au


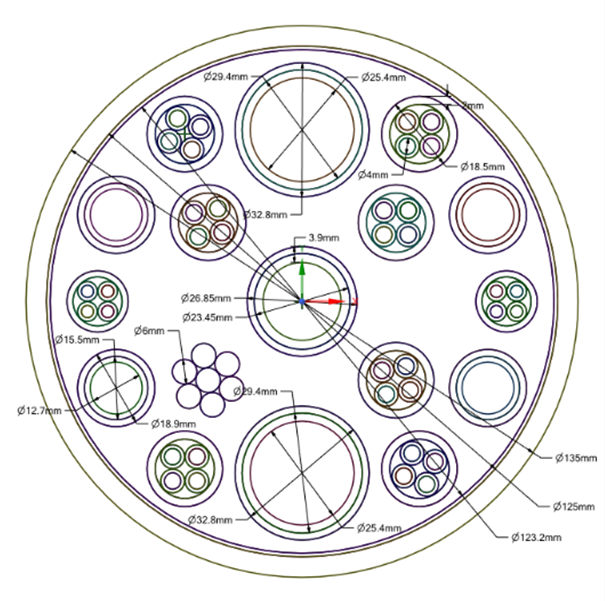


**Figure S2.** Schematic of umbilical cable cross-section with an outer diameter of 135 mm. Outer sheath: polyethylene; internal plastics: polyamide; filling material: epoxy thermoset; electrical insulation: PVC, etc.
